# Supplementary material for: iPhone-imaged and cell-powered electrophoresis titration chip for the alkaline phosphatase assay in serum by the moving reaction boundary
Source: Royal Society of Chemistry journal article supplement (doi:10.1039/c8lc00163d), 2018-01-01
Supplement: c8lc00163d1.pdf [file c8lc00163d1.pdf]

## Online Supporting Materials

1

### 2 iPhone-imaged and cell-powered electrophoresis titration chip for 3 alkaline phosphatase assay in serum by moving reaction boundary

4 Xin-yu Cao,<sup>1,2</sup> Fan-zhi Kong,<sup>1,2</sup> Qiang Zhang,<sup>1,2</sup> Wei-wen Liu,<sup>2</sup> Xiao-ping Liu,<sup>2</sup> Guo-qing Li,<sup>2</sup> Ran  
5 Zhong,<sup>1,2</sup> Liu-yin Fan,<sup>\*3</sup> Hua Xiao,<sup>\*1</sup> and Cheng-xi Cao<sup>\*1,2</sup>

6 <sup>1</sup>. School of Life Sciences and Biotechnology, State Key Laboratory of Microbial Metabolism, Shanghai Jiao  
7 Tong University, Shanghai 200240, China

8 <sup>2</sup>. Department of Instrument Science and Engineering, School of Electronic Information and Electrical  
9 Engineering, Shanghai Jiao Tong University, Shanghai 200240, China

10 <sup>3</sup>. Engineering Training Center, Shanghai Jiao Tong University, Shanghai 200240, China

11

12

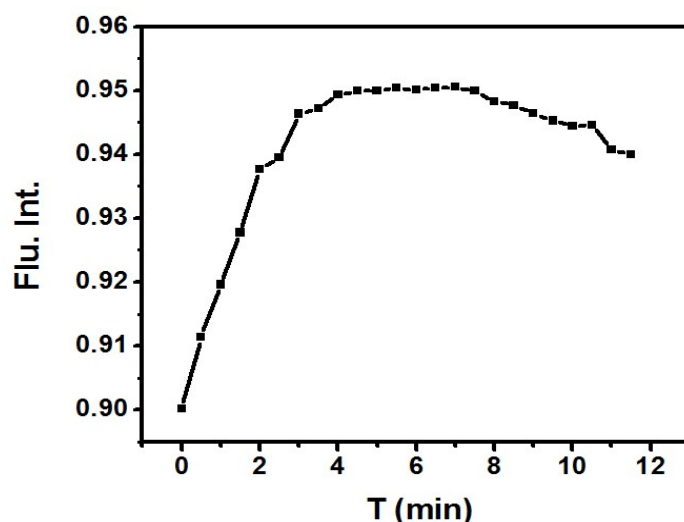

13

14 **Figure S1.** The fluorescent intensity changes with the reaction time of ALP.

15

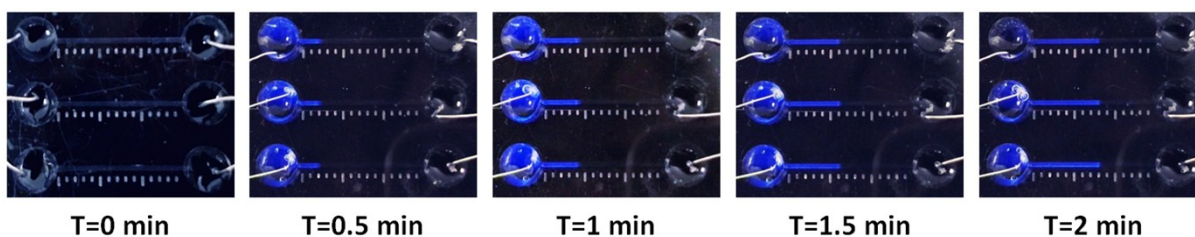

17

18 **Figure S2.** The photos obtained by cell phone of the MRB displacements during 0-2 min run  
19 of MRB created with the acidic buffer of Tris-HCl (pH 6.0) and the alkali of [4-MU]<sup>-</sup>  
20 catalyzed by ALP.

20

\* The first corresponding Author: Prof. Cheng-Xi Cao, Fax: +86 21-3420 5820, email: [cxcao@sjtu.edu.cn](mailto:cxcao@sjtu.edu.cn); Dr Liu-Yin Fan, email: [lyfan@sjtu.edu.cn](mailto:lyfan@sjtu.edu.cn); Prof. Hua Xiao, email: [huaxiao@sjtu.edu.cn](mailto:huaxiao@sjtu.edu.cn).

<sup>1</sup> The first two authors have equal contribution to the work.

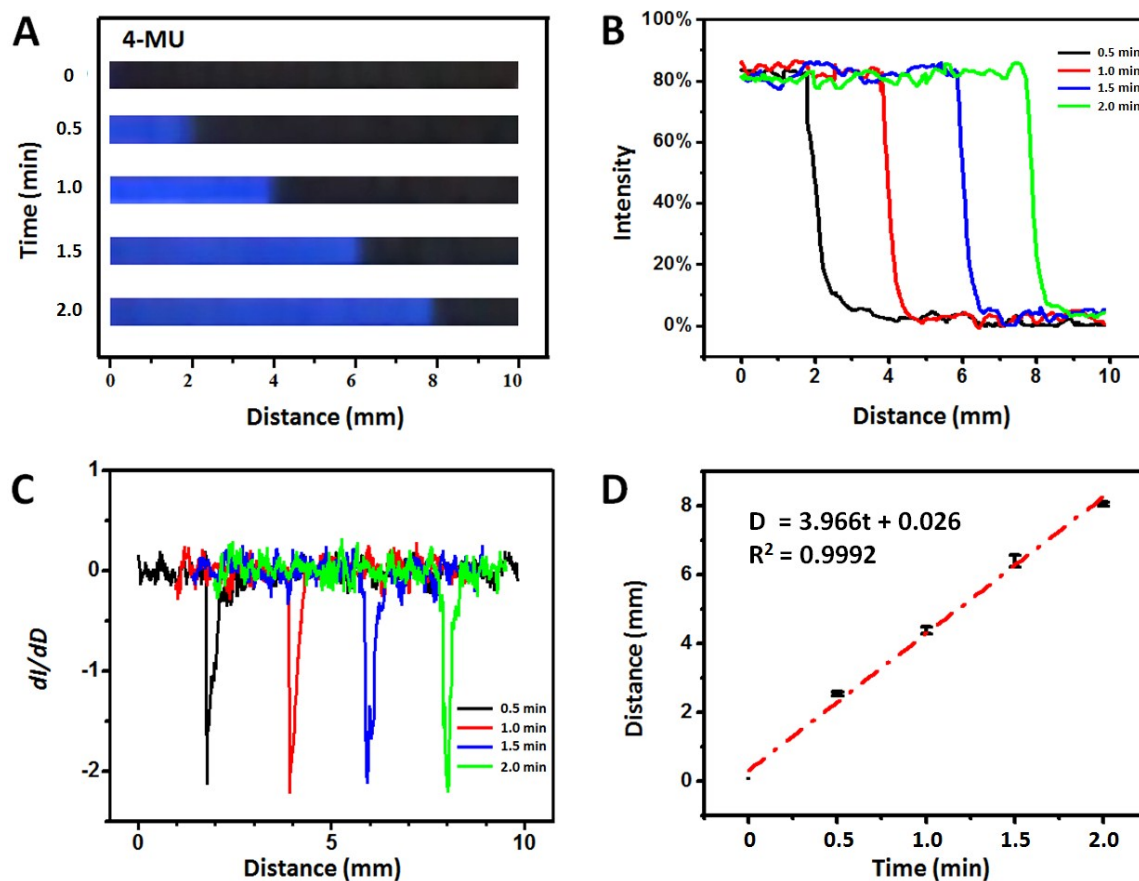

21

22 **Figure S3.** Experiments on ALP-ET chip and data analysis. (A) Boundary displacements during 0-2 min  
 23 run of MRB created with the acidic buffer of Tris-HCl (pH 6.0) and the alkali of [4-MU]<sup>-</sup> catalyzed by  
 24 ALP; (B) Raw intensity data vs moving distance obtained by MetaMorph software through line scanning  
 25 along MRB moving direction; (C) Determination of MRB location via differential curves of  $dI/dD$  vs  
 26 distance in 2 min; (D) Calibration curves of boundary moving distance vs time, and the error bars were  
 27 given. Operation conditions: 3.0 U/L ALP, 6.5 mM 4-MUP, Na<sub>2</sub>CO<sub>3</sub>-NaHCO<sub>3</sub> buffer (pH 9.6), Tris-HCl  
 28 buffer (pH 6.0), 100 mM KCl, 1% agarose gel, 2 V/mm and 25 °C room temperature. Three parallel ET  
 29 runs were made for each point.

30

31

32

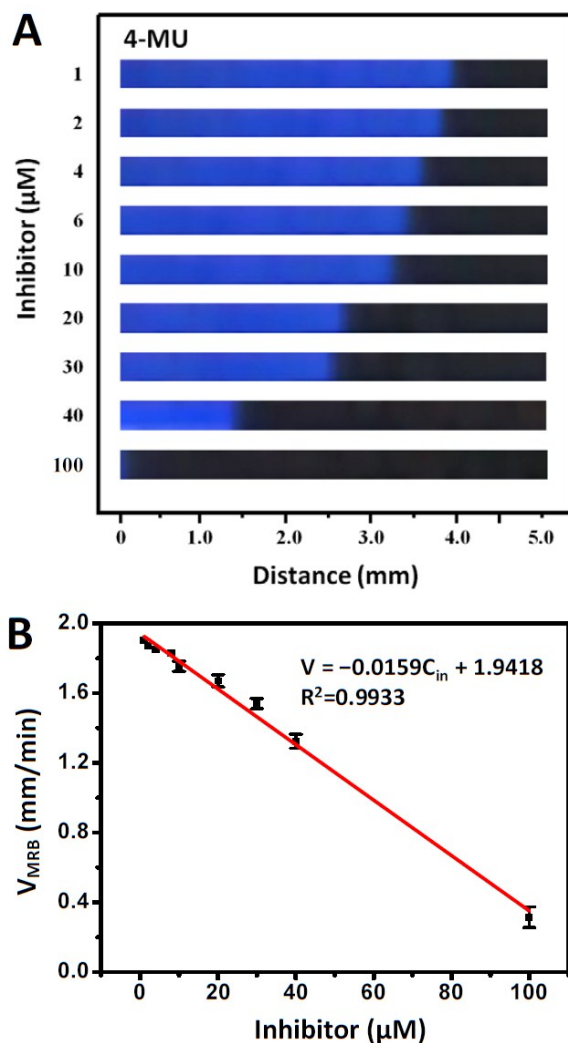

33

34 **Figure S4.** (A) Boundary displacements at 1 min of ALP-ET in the presence of  $\text{Na}_3\text{VO}_4$  with different  
 35 concentrations (from 1  $\mu\text{M}$  to 100  $\mu\text{M}$ ); (B) Regression curve of MRB moving velocity vs inhibitor  
 36 concentration:  $V = -0.0159C_{\text{in}} + 1.9418$ ,  $R^2 = 0.9933$ . Three parallel runs were made for each point.

37

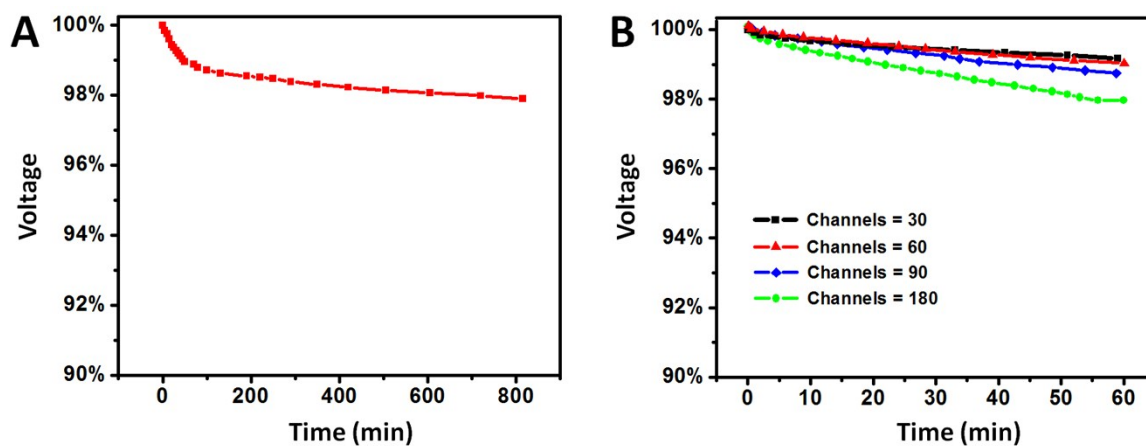

38

39 **Figure S5.** Stability/durability of the lithium cell. (A) Stability of the obtained signal when the cell  
 40 successively worked; (B) The maximum number of the proposed assay per one cell fully charged (180  
 41 channels/cell) in 60 minutes.
